# Supplementary material for: Subglacial hydrology modulates basal sliding response of the Antarctic ice sheet to climate forcing
Source: Copernicus journal article supplement (doi:10.5194/tc-16-4537-2022), 2022-10-27
Supplement: Supplementary file 1 [file tc-16-4537-2022-supplement.pdf]

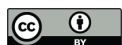

*Supplement of*

## **Subglacial hydrology modulates basal sliding response of the Antarctic ice sheet to climate forcing**

**Elise Kazmierczak et al.**

*Correspondence to:* Elise Kazmierczak ([elise.kazmierczak@ulb.be](mailto:elise.kazmierczak@ulb.be))

The copyright of individual parts of the supplement might differ from the article licence.

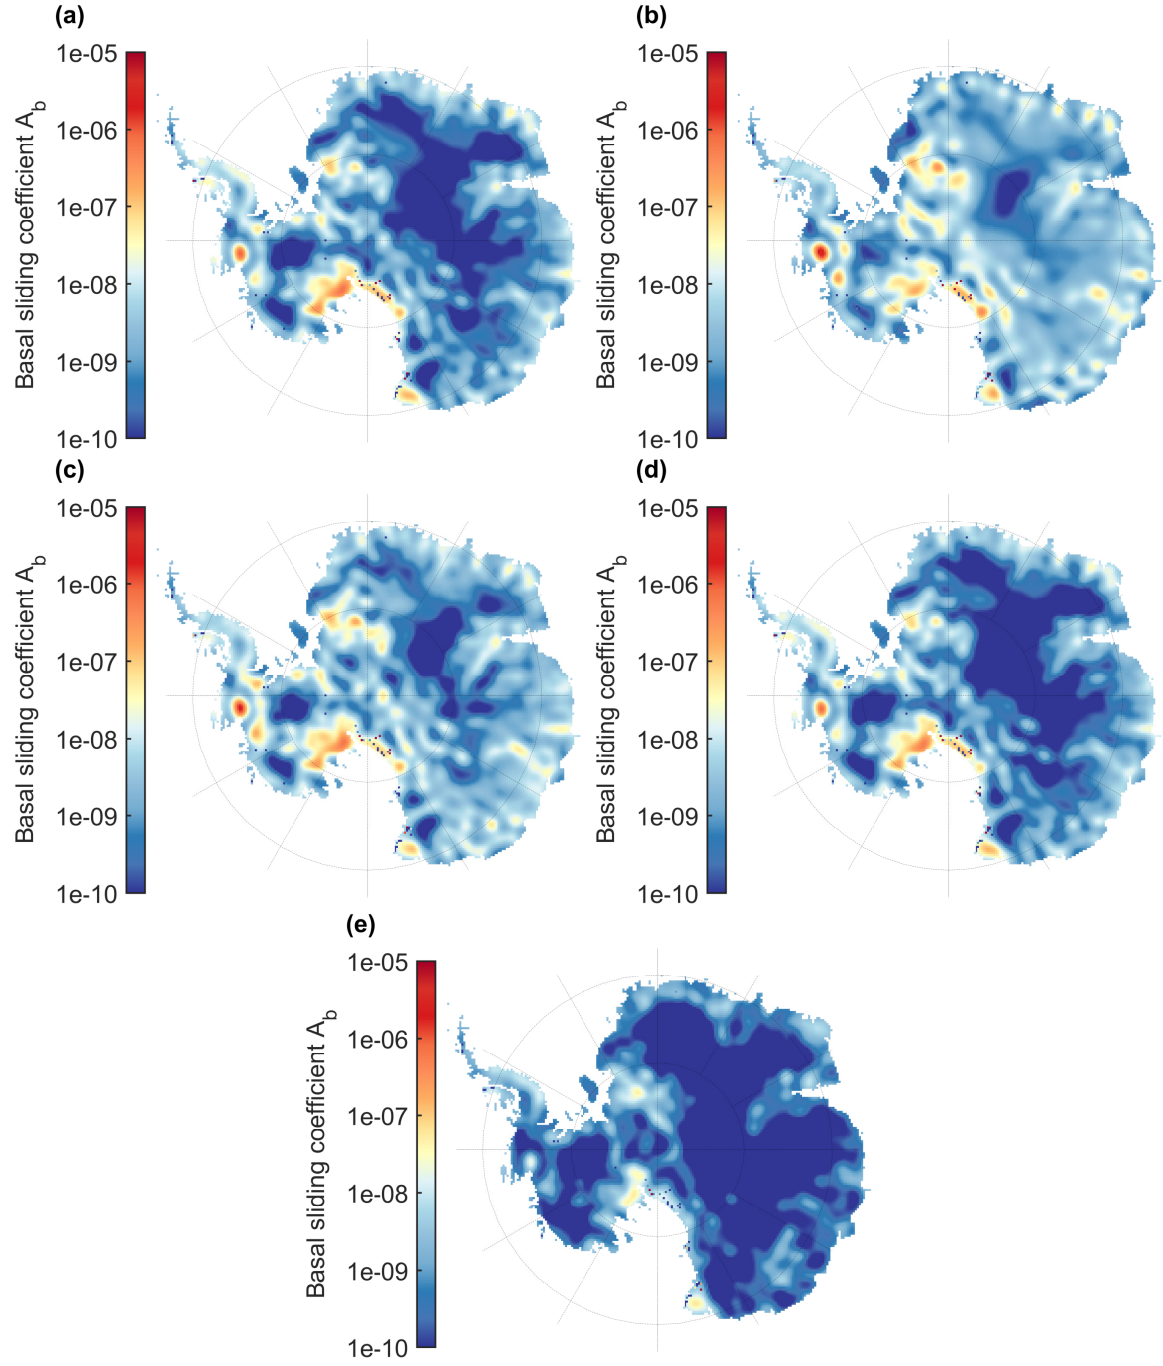

Figure S1: Basal sliding coefficient  $A_b$  obtained through a nudging method with  $m = 1$  according to the different subglacial models: (a) NON; (b) HAB; (c) SWD; (d) SWF; (e) TIL.

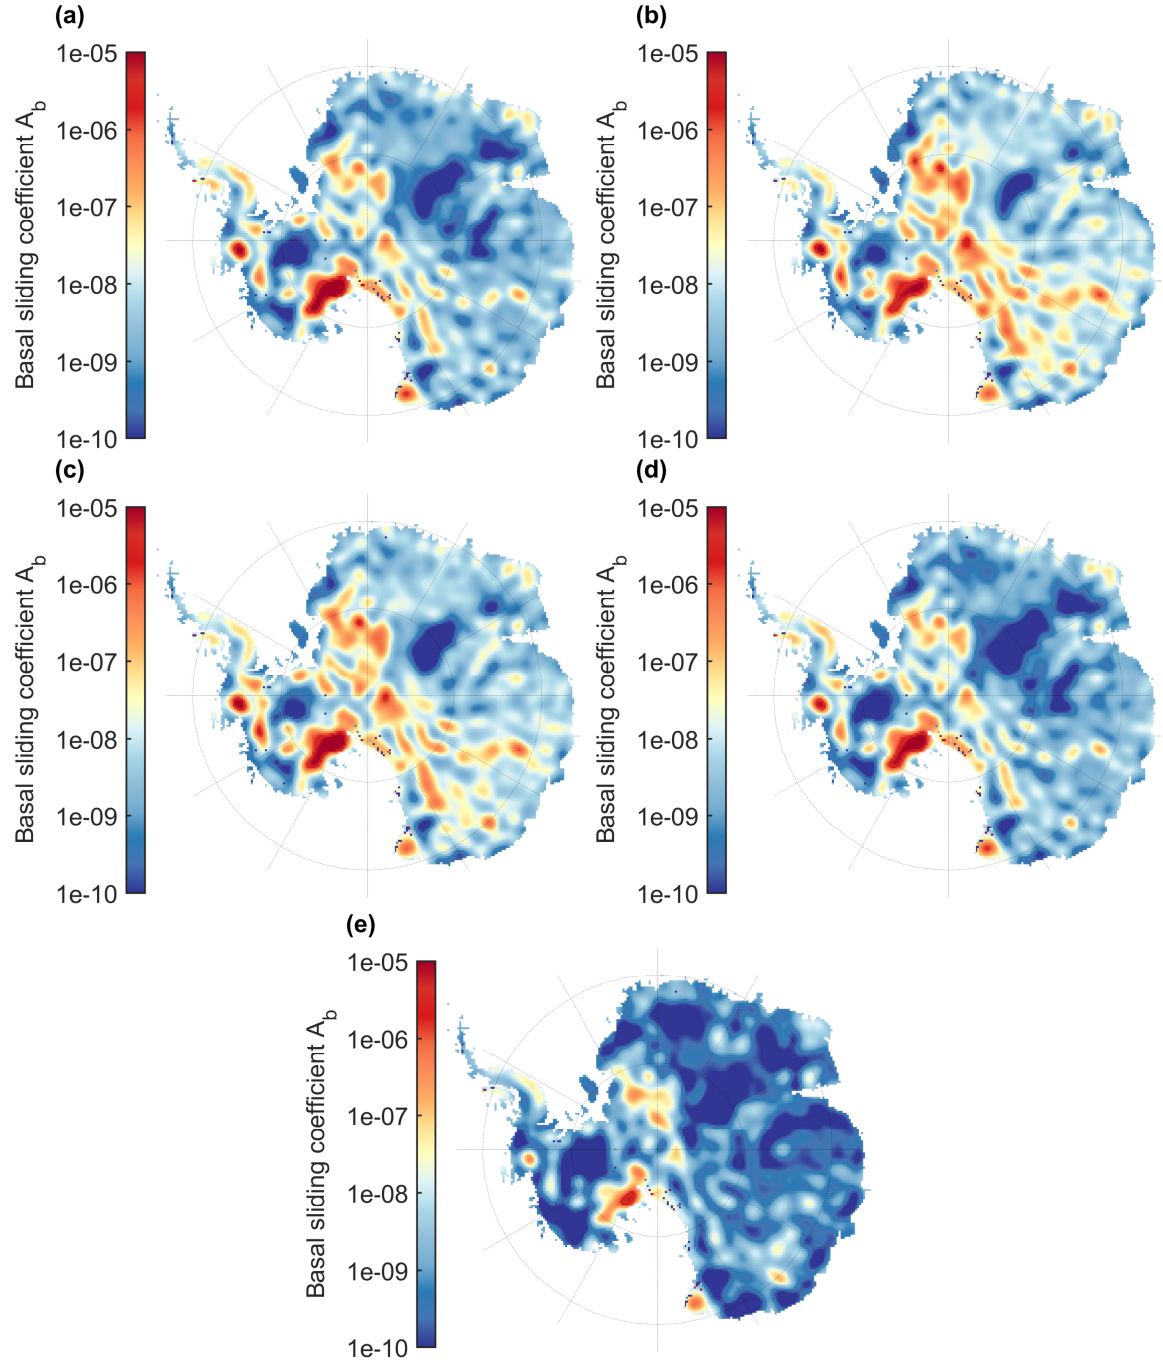

Figure S2: Basal sliding coefficient  $A_b$  obtained through a nudging method with  $m = 3$  according to the different subglacial models: (a) NON; (b) HAB; (c) SWD; (d) SWF; (e) TIL.
